# Supplementary material
Source: Springer Nature journal article supplement (https://www.springermedizin.de/resource/supplementary/12961_2009_96_MOESM2_ESM.pdf/9571406)
Supplement: MOESM2 [file 9571406]

- |                                                                          |                                                             |                                                                         |
|--------------------------------------------------------------------------|-------------------------------------------------------------|-------------------------------------------------------------------------|
| 1. DBL-Centre for Health Research and Development, Denmark. Coordinating | 5. Institute of Development Studies (IDS), Tanzania         | 9. Institute of Anthropology, Gender and African Studies (IAGAS), Kenya |
| 2. Centre for International Health (CIH), University of Bergen, Norway   | 6. National Institute of Medical Research (NIMR) , Tanzania | 10. Department of Community Medicine (DCM) Zambia                       |
| 3. Prince Leopold Institute of Tropical Medicine (ITM), Belgium          | 7. Primary Health Care Institute (PHCI), Tanzania           | 11. Institute of Economic and Social Research, (INESOR), Zambia         |
| 4. Umea International School of Public Health (UISPH), Sweden            | 8. Centre for Public Health Research (CPHR), Kenya          | 12. Joint Centre of Bioethics. University of Toronto, Canada            |
